# Supplementary material
Source: Springer Nature journal article supplement (https://www.springermedizin.de/resource/supplementary/12946_2011_145_MOESM1_ESM.pdf/9555260)

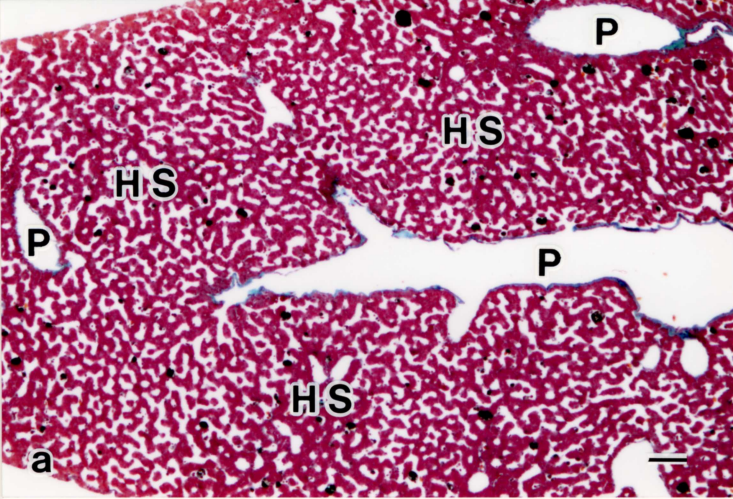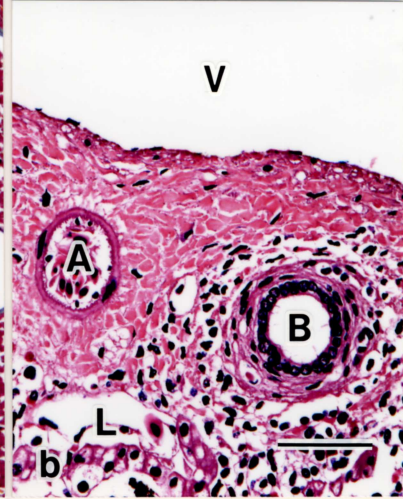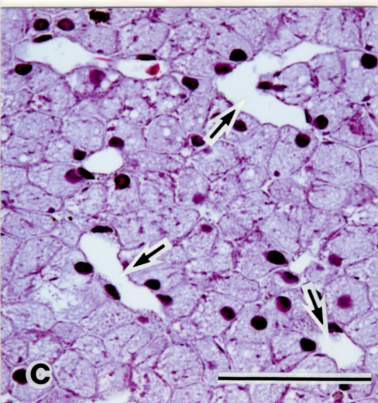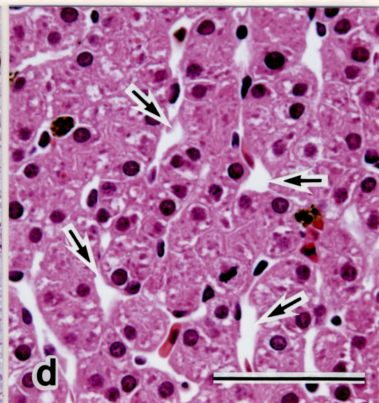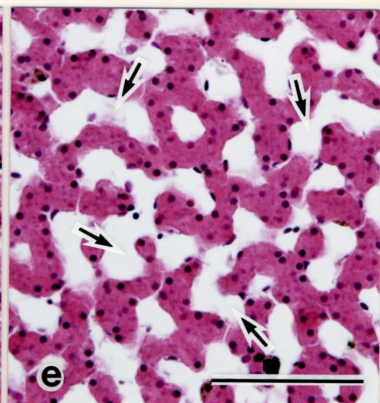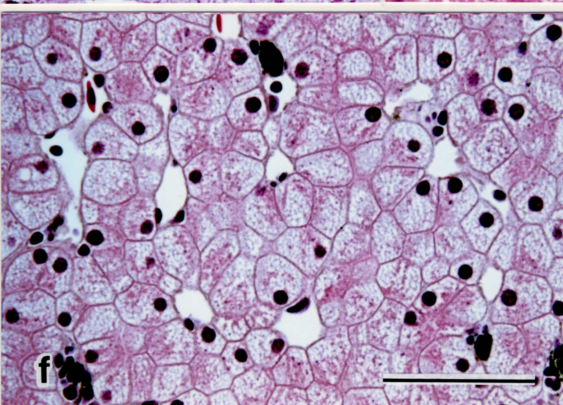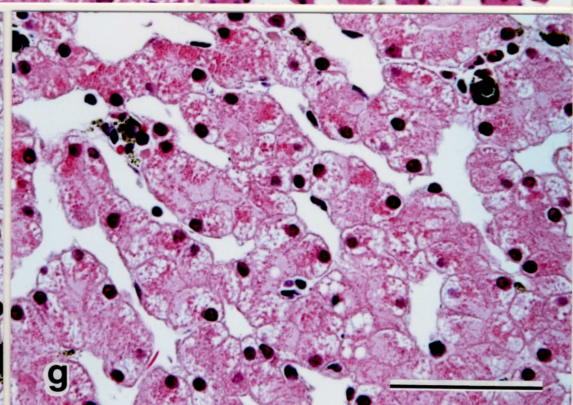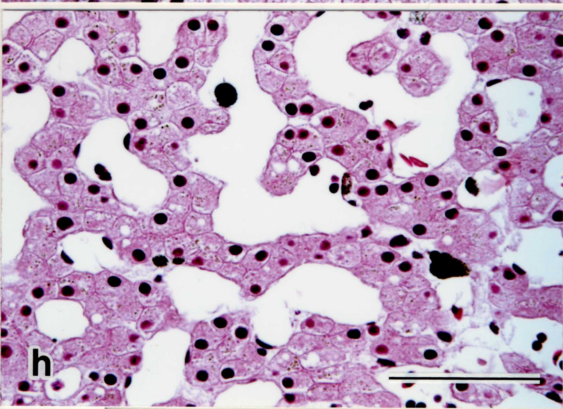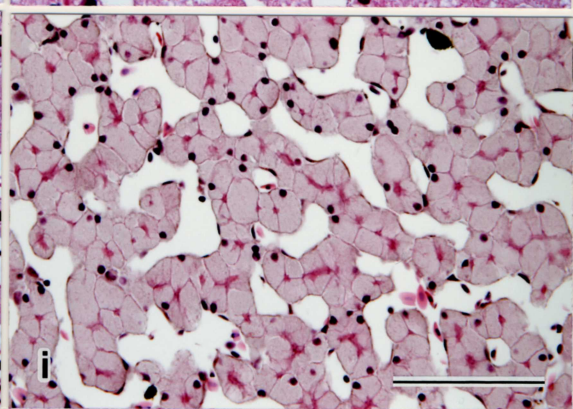

Supplement: MOESM1 [file 9555260]
